# Supplementary material for: Identification of novel post-transcriptional features in olfactory receptor family mRNAs
Source: PubMed Central journal article supplement (PMC4627058; doi:10.1093/nar/gkv324), 2015-04-23

Figure S1

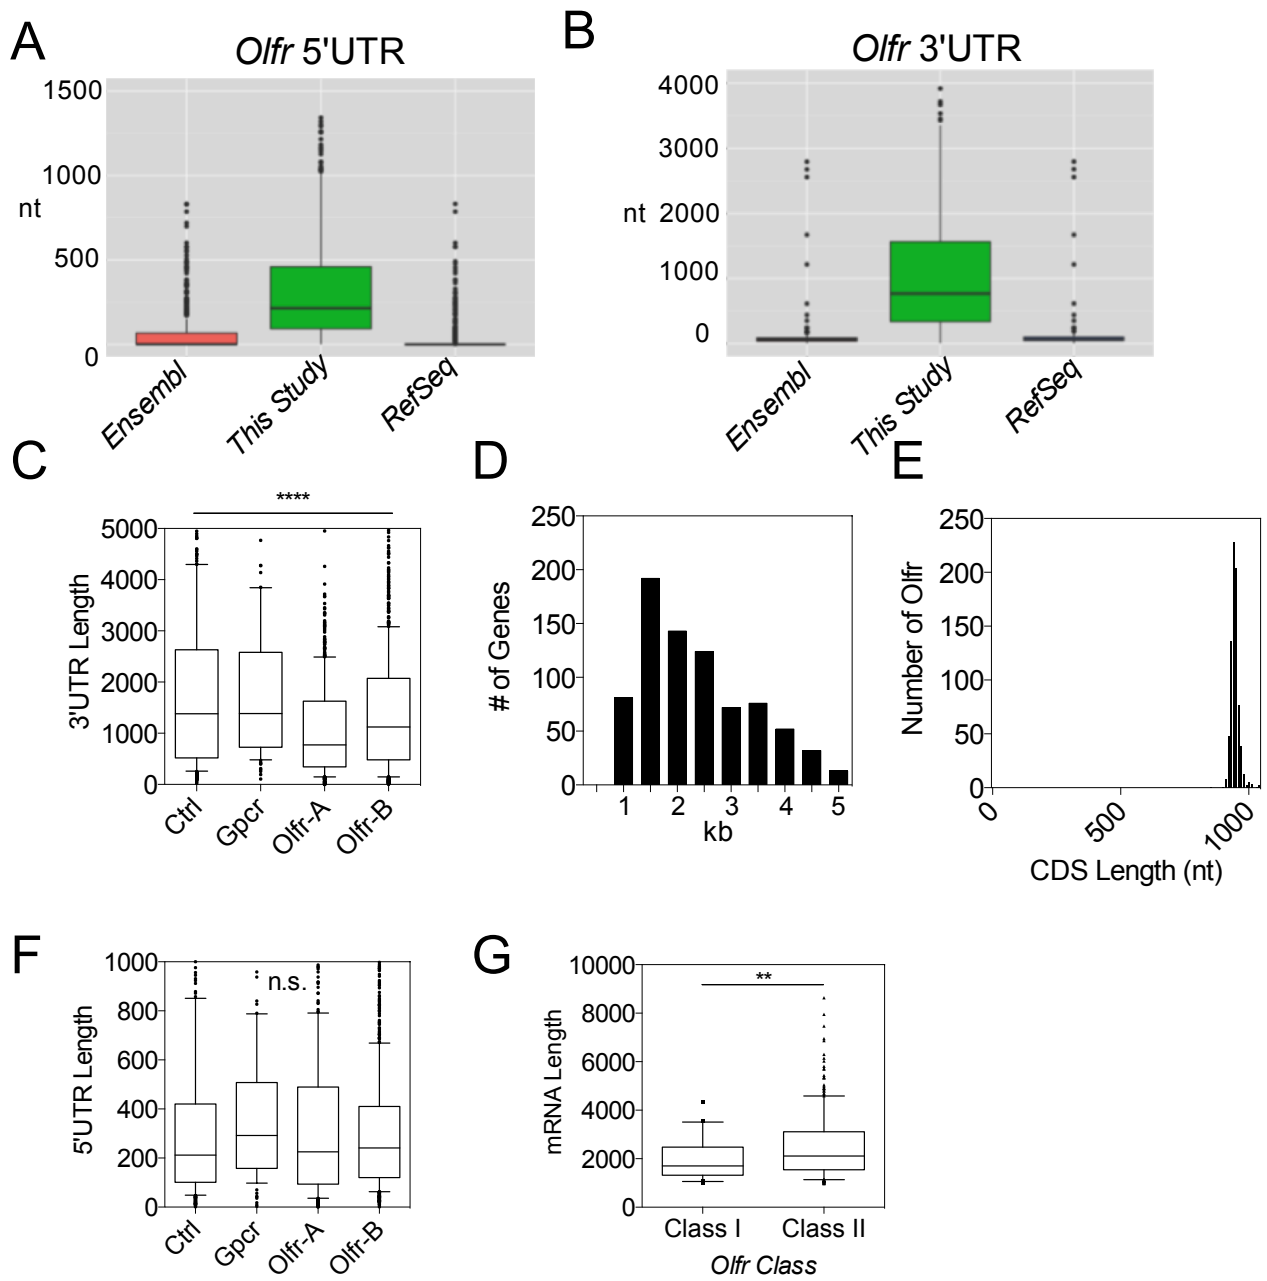

Figure S2

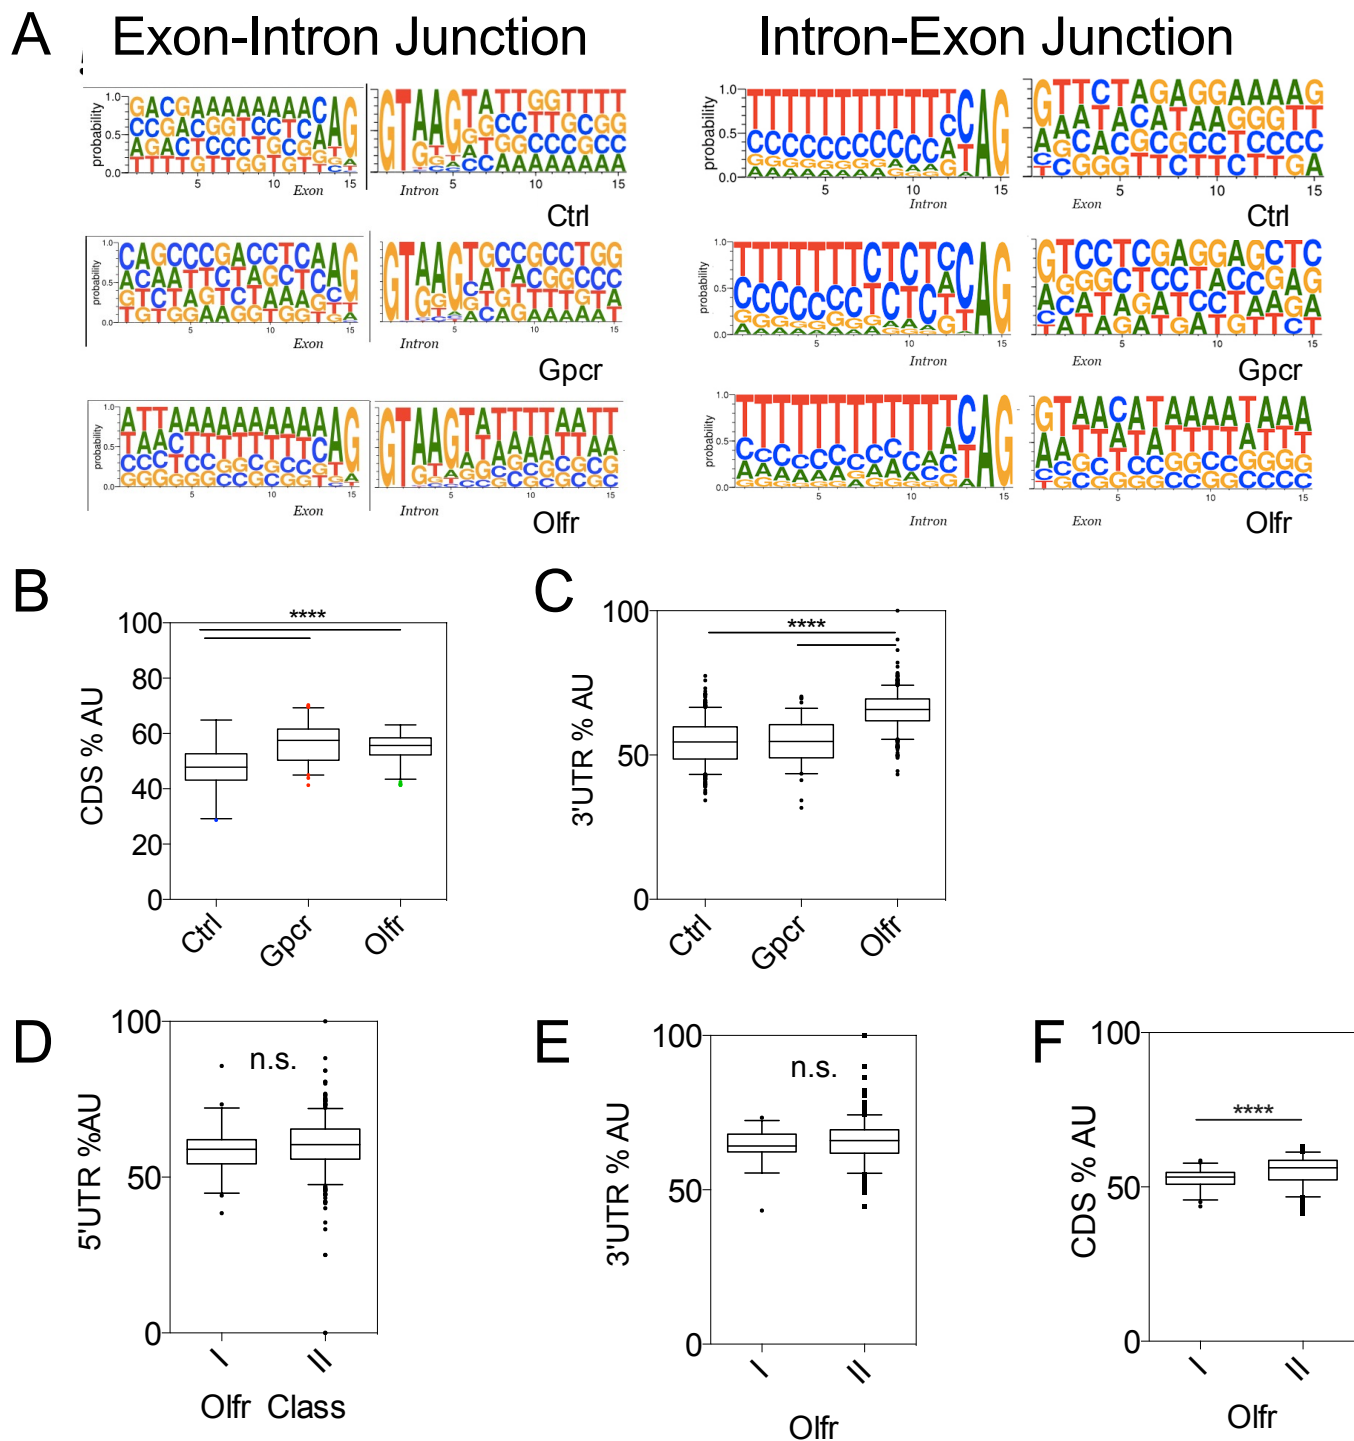

Figure S3

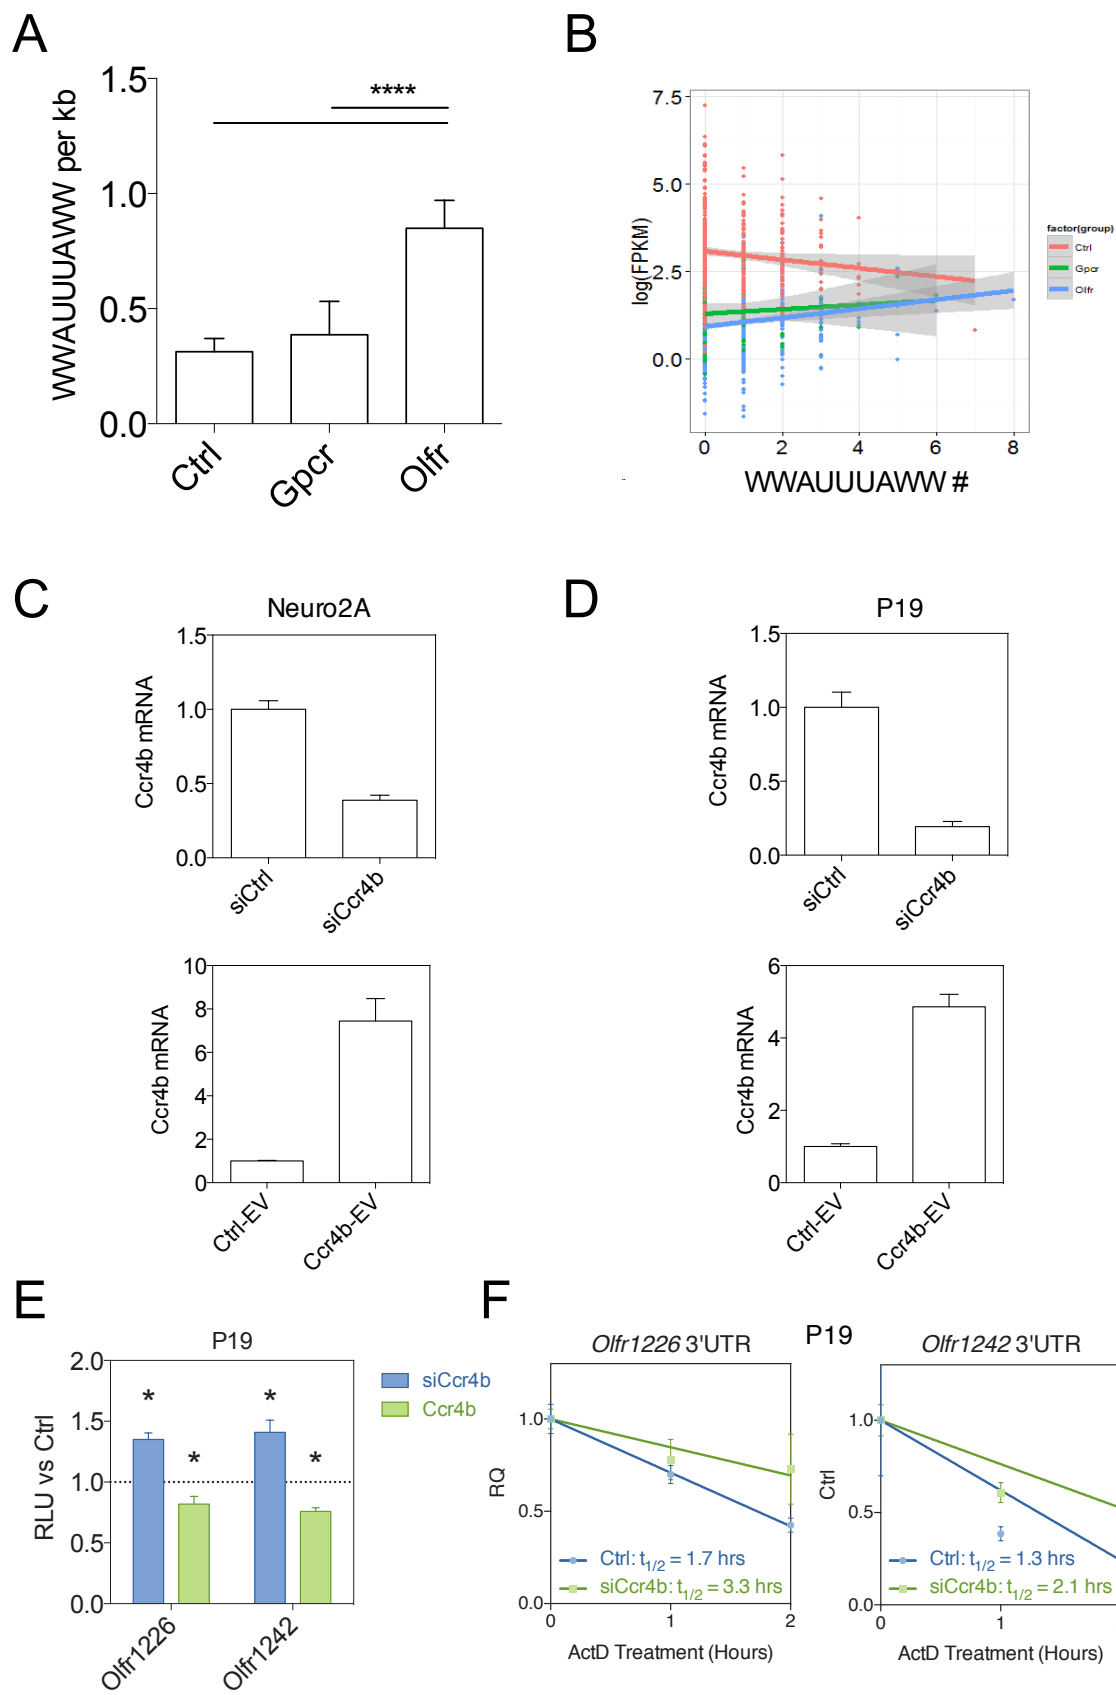

Figure S4

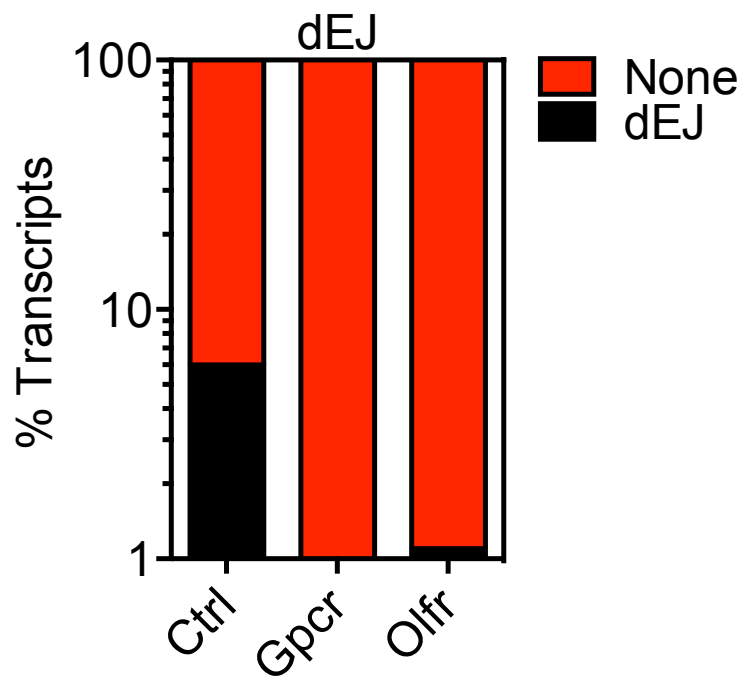

Supplement: supp_gkv324_Supplementary_Figures.pdf [file supp_gkv324_Supplementary_Figures.pdf]
